# Supplementary material for: Inhaled Corticosteroids Selectively Alter the Microbiome and Host Transcriptome in the Small Airways of Patients with Chronic Obstructive Pulmonary Disease
Source: Biomedicines. 2022 May 11;10(5):1110. doi: 10.3390/biomedicines10051110 (PMC9138653; doi:10.3390/biomedicines10051110)
Supplement: Supplementary file 1 [file biomedicines-10-01110-s001.zip › biomedicines-1710674-supplementary.pdf]

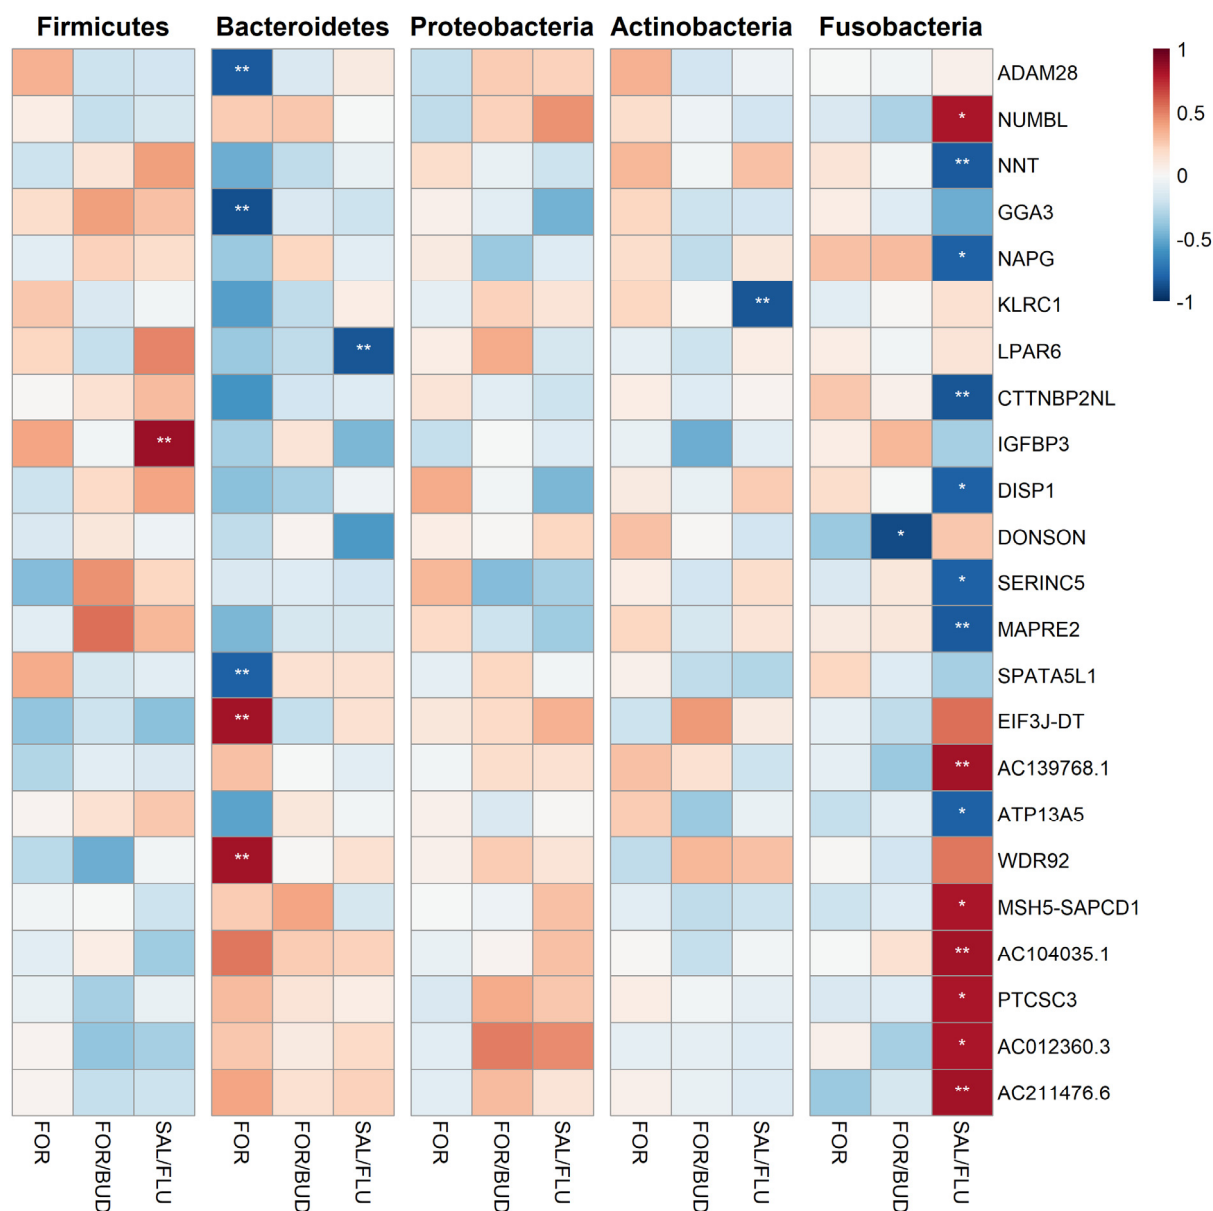

**Figure S1.** Heat map depicting significant correlations between changes (post- minus pre-treatment) in host cell gene expression (delta log<sub>2</sub> counts per million [ $\Delta\log_2\text{CPM}$ ]) and changes in the relative abundance of the top five most abundant phyla. Significantly correlated genes in at least one of the three treatment groups were reported. Colour represents the Spearman's correlation coefficient. Rows represent individual genes. \*\* represents a false discovery rate (FDR) < 0.05. \* represents an FDR < 0.1. FOR = Formoterol-only; FOR/BUD = formoterol/budesonide; SAL/FLU = salmeterol/fluticasone.



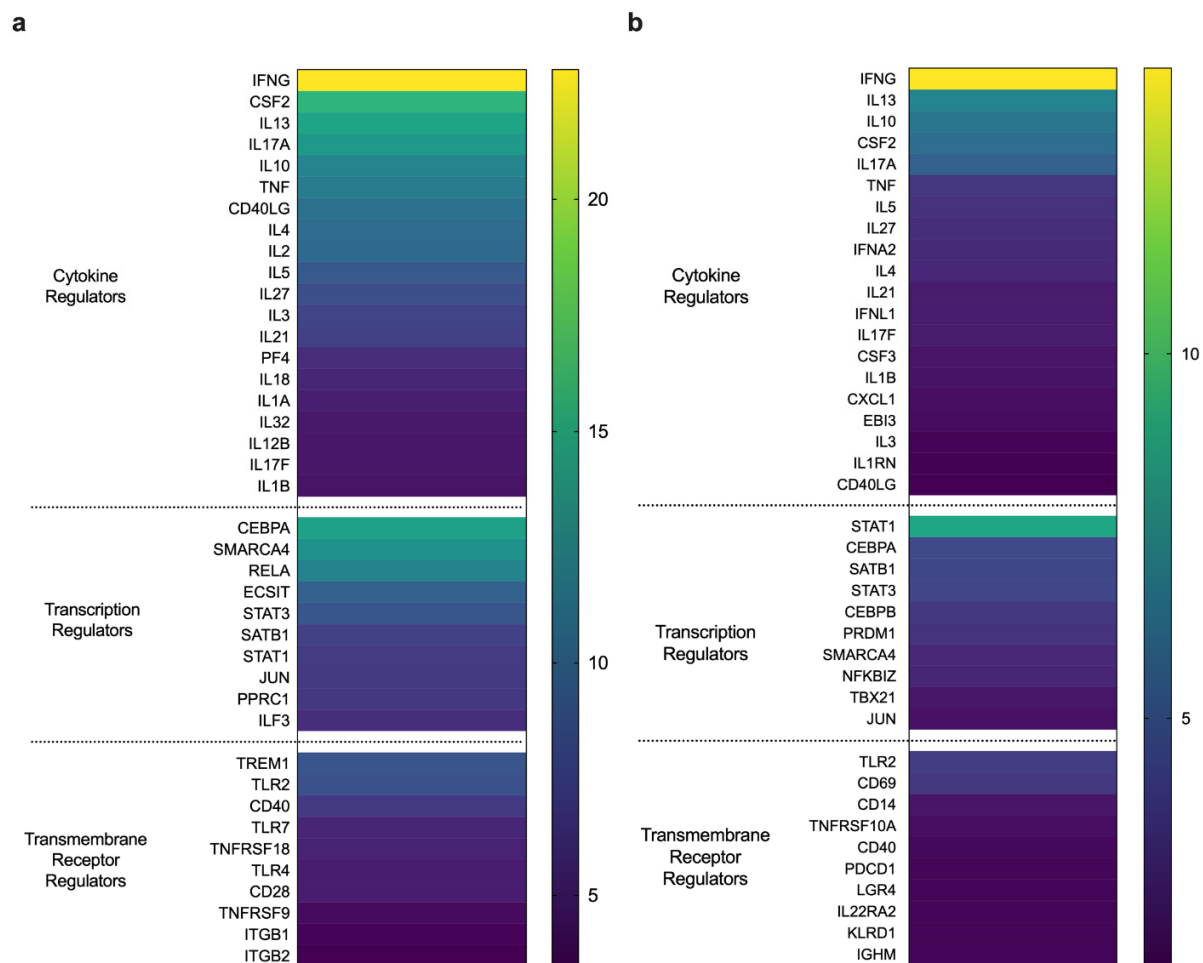

**Figure S3.** Ingenuity Pathway Analysis of predicted upstream transcription, cytokine and transmembrane receptor regulators. **A.** Heatmap of predicted upstream regulators of host cell genes significantly correlated to changes in the Shannon diversity index. **B.** Heatmap of predicted upstream regulators of host cell genes significantly correlated to changes in the relative abundance of *Haemophilus*. Rows represent individual predicted regulators. Colour represents the  $-\log(p\text{-value of overlap})$ .

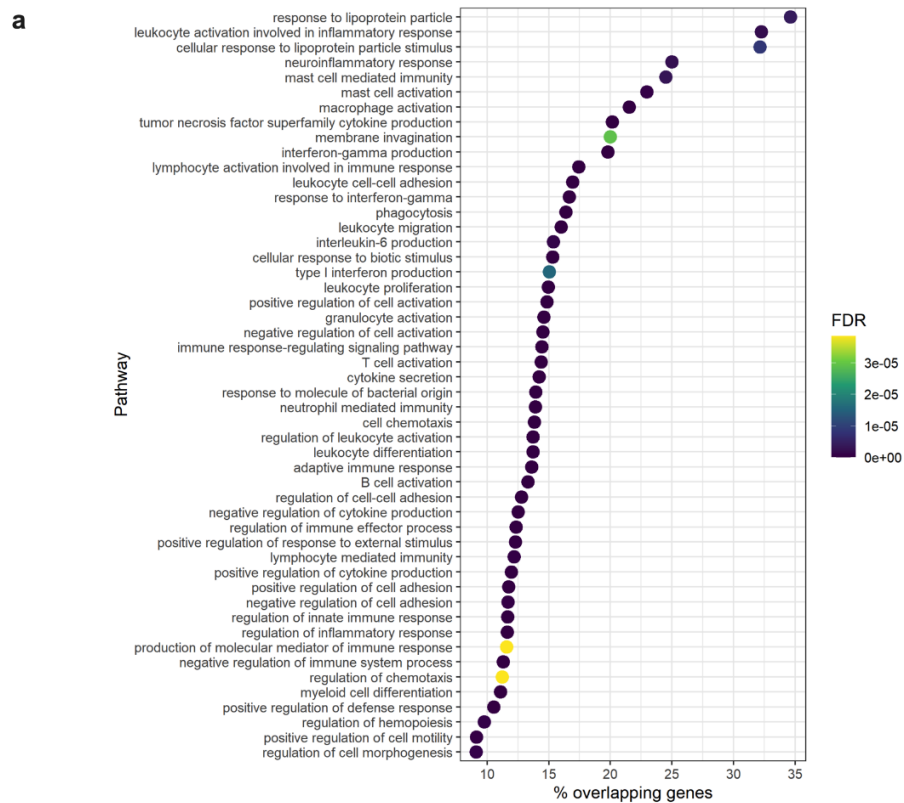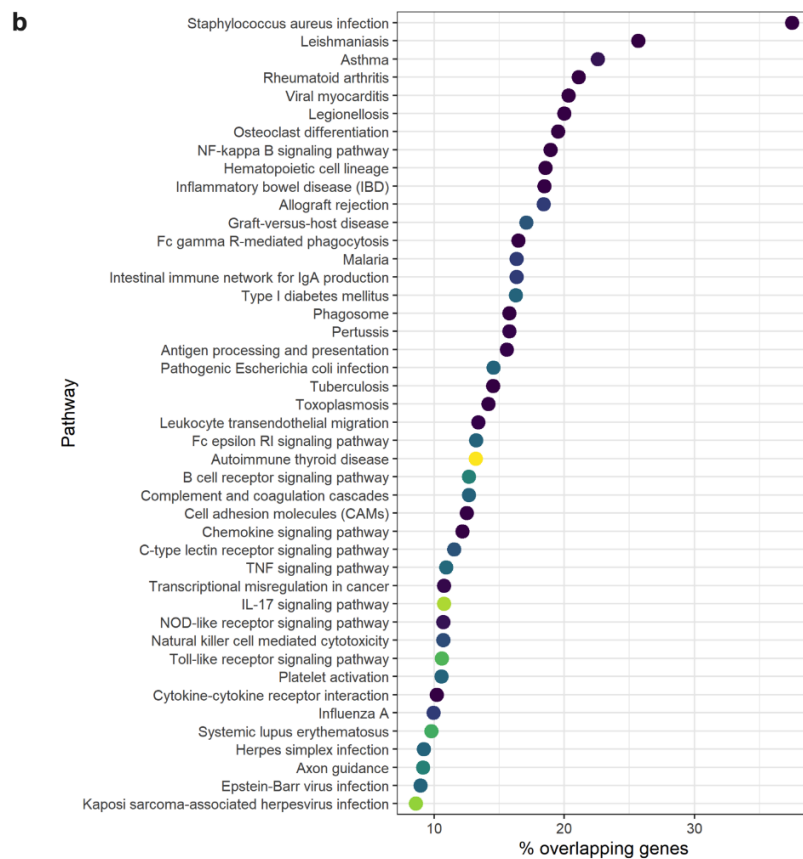

**Figure S4.** Biological processes and pathways enriched from 676 host cell genes significantly correlated with changes in Shannon diversity index. **A.** Gene Ontology (GO) biological process enrichment. **B.** Kyoto Encyclopedia of Genes and Genomes (KEGG) pathway enrichment. Up to 50 of the top GO processes or KEGG pathways by FDR are shown, ordered by % overlapping genes (proportion of genes in the GO process or KEGG pathway that also appear in the list of 676 genes). Abbreviations: FDR, false discovery rate.

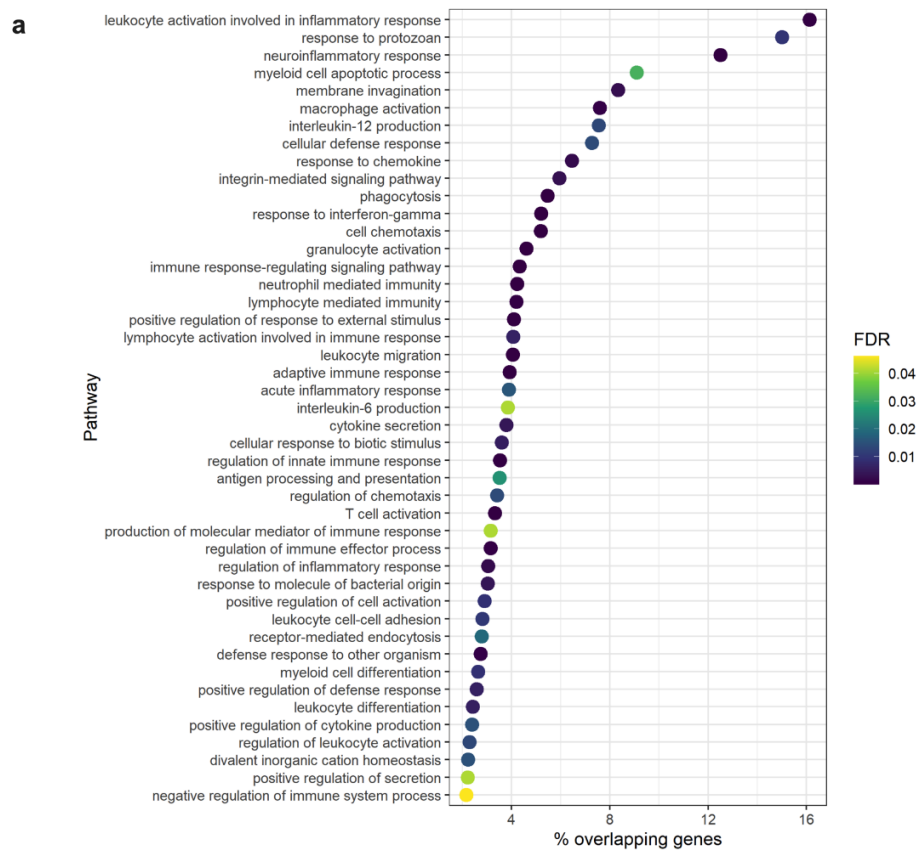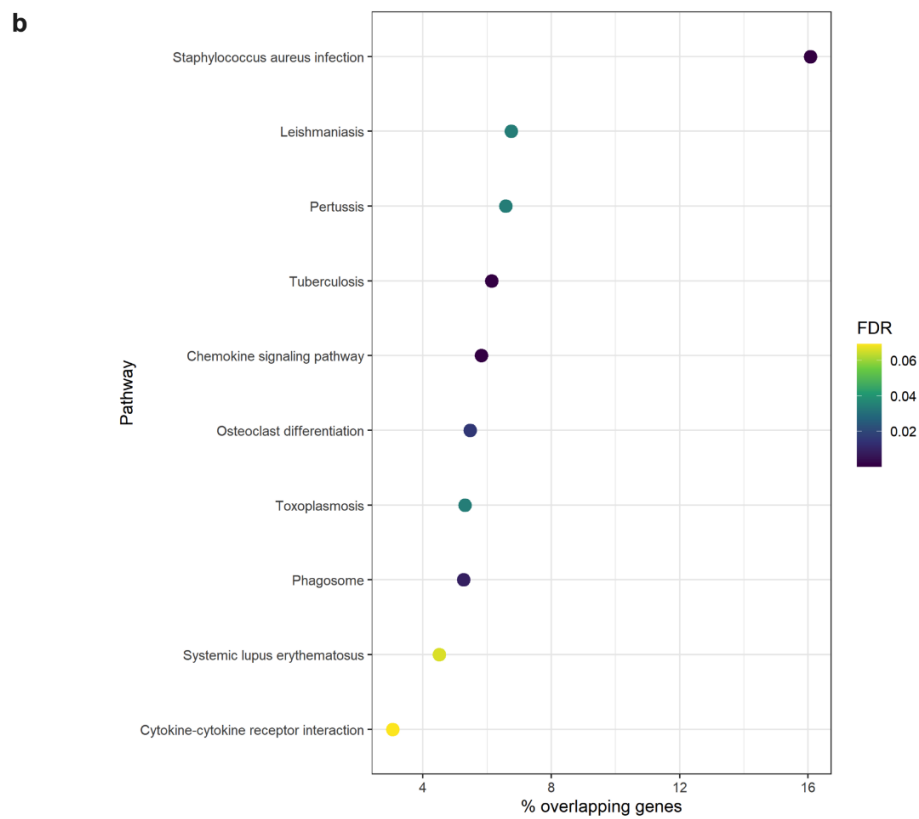

**Figure S5.** Biological processes and pathways enriched from 122 host cell genes significantly correlated with changes in the relative abundance of *Haemophilus*. **A.** Gene Ontology (GO) biological process enrichment. **B.** Kyoto Encyclopedia of Genes and Genomes (KEGG) pathway enrichment. Up to 50 of the top GO processes or KEGG pathways by FDR are shown, ordered by % overlapping genes (proportion of genes in the GO process or KEGG pathway that also appear in the list of 122 genes). Abbreviations: FDR, false discovery rate.
